1  
2  
3  
4  
5  
6  
7  
8  
9  
10  
11  
12  
13  
14  
15  
16  
17  
18  
19  
20  
21  
22  
23  
24  
25  
26  
27  
28  
29  
30  
31  
32  
33  
34

**Effects of varenicline and cognitive bias modification on neural response to smoking-related cues: a randomised control trial**

Angela S. Attwood<sup>\*1,2,3</sup>, Tim M. Williams<sup>4</sup>, F. Joseph McClernon<sup>5</sup>, Rachel Kozink<sup>5</sup>,  
Sally Adams<sup>6</sup>, Karl Scheeres<sup>7</sup>, Amy Green<sup>4</sup>, David Christmas<sup>8</sup>,  
Marcus R. Munafò<sup>1,2,3</sup>

<sup>1</sup> MRC Integrative Epidemiology Unit at the University of Bristol, United Kingdom

<sup>2</sup> UK Centre for Tobacco and Alcohol Studies, University of Bristol, United Kingdom

<sup>3</sup> School of Psychological Science, University of Bristol, United Kingdom

<sup>4</sup> Population Health Sciences, University of Bristol, United Kingdom

<sup>5</sup> Psychiatry and Behavioral Sciences, Duke University School of Medicine, USA

<sup>6</sup> Department of Psychology, University of Bath, United Kingdom

<sup>7</sup> Avon and Wiltshire Mental Health Partnership NHS Trust, United Kingdom

<sup>8</sup> Cambridge and Peterborough NHS Foundation Trust, United Kingdom

\*Corresponding author:

Angela S. Attwood PhD, School of Psychological Science, University of Bristol, 12a

Priory Road, Bristol BS8 1TU, United Kingdom. T: +44.117.331.7450; F:

+44.117.928.8588; E: [angela.attwood@bristol.ac.uk](mailto:angela.attwood@bristol.ac.uk)

Author email addresses: Tim Williams - [tim.williams6@nhs.net](mailto:tim.williams6@nhs.net), F. Joseph McClernon -

[francis.mcclernon@duke.edu](mailto:francis.mcclernon@duke.edu), Rachel Kozink – [rachel.kozink@duke.edu](mailto:rachel.kozink@duke.edu), Sally Adams

- [s.adams@bath.ac.uk](mailto:s.adams@bath.ac.uk), Karl Scheeres – [karlscheeres@nhs.net](mailto:karlscheeres@nhs.net), Amy Green –

[amy.green@bristol.ac.uk](mailto:amy.green@bristol.ac.uk), David Christmas – [david.christmas@cpft.nhs.uk](mailto:david.christmas@cpft.nhs.uk), Marcus R.

Munafò - [marcus.munaf0@bristol.ac.uk](mailto:marcus.munaf0@bristol.ac.uk).

Funding: Investigator Initiated Research Grant, Pfizer Ltd. Grant number WS676950.

Running head: Varenicline, cognitive bias modification and fMRI in smokers

35

36 **Word count:** 5604 (excl. abstract, tables, figures, references).

37

38 Key words: smoking, cognitive bias modification, cue reactivity, attentional bias,

39 relapse, fMRI.

40

41 **Trial Registration:** Current Controlled Trials ISRCTN65690030. Date of registration:

42 30 January 2014.

43

44 **Abstract**

45 Drug-related cognitive biases have been positively associated with drug-craving and  
46 increased likelihood of relapse. Cognitive bias modification paradigms have been  
47 developed to attenuate cognitive biases but there have been few studies that  
48 examined neural responses to these paradigms. This study compared neural  
49 responses following CBM and explored whether CBM effects were potentiated by  
50 varenicline administration. This was a double-blind placebo-controlled study with two  
51 between subject factors of drug (varenicline, placebo) and CBM (attend towards  
52 smoking cues, train away from smoking cues, control training) that recruited daily ( $\geq 10$   
53 cigarettes per day) non-treatment seeking smokers. Participants ( $n = 67$ , 53% female)  
54 were randomised to one-week of drug administration (varenicline or placebo) before  
55 attending a study session at which they were randomised to CBM condition, and  
56 underwent an fMRI scan where they were presented with smoking and neutral cues.  
57 Neural response to smoking (vs. neutral) cues, cognitive bias, craving and mood were  
58 assessed. There was no evidence of CBM effects on any outcomes. There was  
59 evidence of effects of varenicline on craving, with greater reductions in craving in the  
60 week preceding the study session in the varenicline group ( $p = 0.04$ ,  $\eta_p^2 = .06$ ). There  
61 was also evidence of a drug by CBM interaction for neural responses ( $z = 3.78$ ,  $p$   
62  $< 0.001$ ). Compared to placebo, varenicline was associated with greater activation in  
63 the right temporal middle gyrus in the CBM control condition, compared to an opposite  
64 effect in the CBM “attend towards” condition. These data suggest that CBM does not  
65 modify cognitive bias, subjective craving and mood, or neural response to smoking  
66 cues. There was also no evidence that CBM effects were potentiated by varenicline.

67 **Introduction**

68 Smoking remains the leading cause of preventable death worldwide, with an  
69 estimated 6 million tobacco-related deaths occurring every year (World Health  
70 Organization, 2013). Despite many smokers reporting wanting to quit, few achieve  
71 long-term abstinence. This may be partly due to the presence of smoking-related cues  
72 in the environment, which through repeated and contingent pairing with drug  
73 administration, acquire powerful motivational properties that can precipitate craving  
74 and drug seeking (Foltin & Haney, 2000; Gray, LaRowe, & Upadhyaya, 2008;  
75 McClernon et al., 2016; Mucha, Pauli, & Angrilli, 1998; Muntaner et al., 1989).

76 Drug-related cognitive biases, characterised by selective or disproportionate  
77 attention allocation to drug cues, have been reported in users of a number of drugs  
78 and have been positively associated with drug craving (Field, Munafò, & Franken,  
79 2009; Wakefield, Germain, & Henriksen, 2008), future drug use (Cox, Pothos, &  
80 Hosier, 2007), approach behaviours to drug-related cues (Franken, 2003) and  
81 increased likelihood of relapse (Marissen, Franken, Blanken, van den Brink, &  
82 Hendriks, 2007). Of particular importance, the drug-stimulus learning that is believed to  
83 underlie these biases is long-lasting, which makes an individual vulnerable to relapse  
84 long after initial cessation. In smokers, increased reactivity to smoking cues has been  
85 found to predict decreased likelihood of cessation (Abrams, Monti, Carey, Pinto, &  
86 Jacobus, 1988; Niaura, Abrams, Demuth, Pinto, & Monti, 1989; Waters et al., 2004).  
87 Consequently, reduction in cognitive bias is a potential target for therapeutic  
88 intervention.

89 There is evidence that it is possible to reduce cognitive biases using computer-  
90 based cognitive bias modification (CBM) paradigms that “train” individuals to allocate  
91 attention away from disorder-relevant cues. CBM has been shown to reduce cognitive  
92 and has also been associated with reduction in other symptoms such as low mood  
93 (Baert, De Raedt, Schacht, & Koster, 2010). Attwood and colleagues (Attwood,  
94 O’Sullivan, Leonards, Mackintosh, & Munafò, 2008) reported decreased cognitive bias

95 in a group of smokers following one session of stimulus-avoidance CBM using a  
96 modified dot probe task. Compared to a group who had been trained to attend to  
97 smoking cues, there was evidence that the avoid group also showed attenuated  
98 craving in response to in vivo smoking cues in a subsequent cue exposure test (male  
99 participants only). A subsequent study in tobacco smokers found similar decreases in  
100 cognitive bias following CBM, but did not observe generalisation of these effects of  
101 other relevant behaviours (e.g., cigarette craving) or novel (untrained) stimuli (Field,  
102 Duka, Tyler, & Schoenmakers, 2009). The weak effects may be due to the limited  
103 number of sessions used in laboratory-based studies and that multiple session  
104 approaches may be more efficacious than single session CBM (Lopes, Pires, &  
105 Bizarro, 2014; McHugh, Murray, Hearon, Calkins, & Otto, 2010; Unrod et al., 2014).  
106 Taken together, the research suggests CBM may have some clinical utility but the  
107 effects are compromised by small effect sizes and issues with generalisation of the  
108 training effects.

109         There has been growing interest in the development of combination drug-  
110 behavioural therapies, in which a drug is used to augment the outcomes of a  
111 behavioural intervention (Swerdlow, 2012). This may offer a solution to the low efficacy  
112 and reliability of CET effects, if a suitable pharmacological agent can be identified. The  
113 smoking cessation pharmacotherapy varenicline acts as a partial agonist of the  $\alpha 4\beta 2$   
114 nicotinic acetylcholine receptor and aids cessation by reducing cigarette craving and  
115 withdrawal symptoms. However, it has also been associated with a reduction in cue-  
116 related craving in humans (Ray et al., 2013), particularly following chronic  
117 administration (Brandon et al., 2011), and reductions in cue-induced reinstatement of  
118 drug taking in animals (Le Foll et al., 2012; Wouda et al., 2011). Therefore, varenicline  
119 may be a useful adjunct to CBM, particularly as it is already licensed as a smoking  
120 cessation aid.

121         The current study replicated earlier work by examining the effects of CBM on  
122 behavioural measures of cognitive bias (visual dot probe and modified Stroop), and

123 extended the work in two important ways. First, we examined whether 7-day pre-  
124 treatment of varenicline enhanced the effects of CET on smoking cue reactivity and  
125 attentional bias. Second, using fMRI, we examined the neural responses to smoking  
126 cues following treatment. Neuroimaging studies suggest that drug-related cognitive  
127 biases are the result of a failure of cognitive regulatory systems to increase control in  
128 the presence of salient cues that increase processing in the reward and emotional  
129 centres of the brain (e.g., striatum, amygdala) (Hester & Luijten, 2013). Therefore,  
130 these additional measures offer important insight into the mechanisms underlying the  
131 effects of CBM, particularly as computer-based measures of cognitive bias are known  
132 to lack reliability (Ataya et al., 2012; Field & Christiansen, 2012).

133 In this study, participants attended two sessions, approximately one-week  
134 apart. Participants were randomised to receive either 7-day treatment of varenicline or  
135 matched placebo, prior to completion of 1-hour of CBM training. For CBM training,  
136 participants were further randomised (stratified by drug group) to one of three  
137 conditions: 1) training towards smoking cues (attend), 2) training away from smoking  
138 cues (avoid), or 3) control training (control). After training, participants underwent a cue  
139 reactivity task during an fMRI scan. We hypothesised that participants in the CBM-  
140 avoid condition would show a decrease in cognitive bias and neural response to  
141 smoking-related cues compared to those in the CBM-attend and CBM-control  
142 conditions, and that changes in cognitive bias and neural response, would be greatest  
143 in individuals trained to avoid smoking-related cues *and* treated with varenicline.

144

## 145 **Methods**

### 146 **Participants**

147 Daily smokers ( $\geq 10$  cigarettes or 15 roll ups/day who smoke within one hour  
148 of waking) were recruited from the staff and students at the University of Bristol and  
149 the general population through existing participant databases, posters, online flyers  
150 and word of mouth. Participants were required to be between 18 and 40 years of

Running head: Varenicline, cognitive bias modification and fMRI in smokers

151 age, fluent in English and registered with a General Practitioner. Exclusion criteria  
152 were pregnancy, breast feeding or at risk of pregnancy (i.e., females not using  
153 adequate contraception), substance misuse, high alcohol consumption (>35  
154 units/week if female or >50 units/week if male) or caffeine consumption (> 8 cups of  
155 caffeinated beverage per day), current or past psychiatric disorder, clinically  
156 significant abnormality (including cardiology risk factors), use of medication  
157 (participants were required to be 8 weeks clear of any prescribed medication),  
158 known hypersensitivity to varenicline, high blood pressure or heart rate  
159 (systolic/diastolic >140/90 mmHg or heart rate >90 bpm), uncorrected visual or  
160 auditory impairment, and any condition that would make MRI scanning unsafe (e.g.,  
161 metallic implants) or intolerable. The study was approved by the National Research  
162 Ethics Service (London Brent Committee, reference: 11/LO/1726). All participants  
163 gave written informed consent and were reimbursed £70 at the end of the study.

164

165 **Design**

166 This was a double-blind, placebo-controlled study that used a 2 × 3 between-  
167 subjects design, comprising one factor of drug (varenicline, placebo) and one factor  
168 of CBM group (attend, avoid, control). For the behavioural assessments of cognitive  
169 bias (dot probe, modified Stroop), there was an additional within-subjects factor of  
170 cue type (smoking, neutral).

171

172 **Drug administration**

173 Following initial consent and screening on day 0, varenicline (or matched  
174 placebo) was prescribed by a medical doctor for one week. Participants were told to  
175 take one tablet (0.5 mg) daily on days 1 - 3, two tablets daily (total 1 mg) on days 4 -  
176 6, and one tablet (0.5 mg) on day 7, consistent with standard dosing regimen for  
177 smoking cessation. Participants completed daily diaries detailing the time at which  
178 the tablets were taken and any side effects. Participants attended their second

179 session on day 7 (i.e., their last drug day) and were asked to take the drug in the  
180 morning prior to their study session.

181

## 182 **Randomisation**

183 Participants were randomly assigned to drug and CBM groups (stratified by  
184 gender), but equal numbers of participants per group were maintained. Drugs were  
185 supplied by Pfizer and shipped to University Hospitals Bristol Pharmacy who  
186 prepared two batches of 36 bottles (one for male and one for females). Within each  
187 group of 36 bottles, 18 bottles contained 10 varenicline tablets (0.5 mg each) and 18  
188 bottles contained 10 tablets of matched placebo. Each bottle was given a numeric  
189 identifier that enabled study staff involved in data collection to be fully blinded to  
190 drug condition.

191 In addition, an experimental collaborator (who had no direct contact with the  
192 study participants) prepared a numeric code using random number assignment  
193 software to further randomise participants to CBM groups. Randomisation was  
194 stratified so that equal numbers of male and female participants ( $n = 12$ ) were  
195 allocated across the six experimental cells (drug treatment [2]  $\times$  CBM group [3]).

196

## 197 **Measures and materials**

198 *Materials:* Stimuli for the CBM and the fMRI cue exposure task comprised  
199 full-colour 32 smoking-related pictures and 32 neutral pictures. Smoking-related  
200 cues consisted of full-colour pictures of people smoking. Control cues consisted of  
201 full-colour pictures of people engaged in everyday activities (e.g., talking on the  
202 telephone, writing). Equal numbers of females and males were represented in each  
203 category. The set of cues pictures is the same as used in previous imaging studies  
204 (McClernon, Kozink, Lutz, & Rose, 2009; McClernon, Kozink, & Rose, 2008). For the  
205 cognitive bias modification task, an additional 4 picture pairs, unrelated to smoking,  
206 were used in practice and buffer trials.



207           *Cognitive Bias Modification*: Participants were randomised to complete a  
208 modified visual dot probe task designed to induce a biased cognitive response away  
209 from (avoid:  $n = 24$ ), or towards (attend:  $n = 24$ ) smoking-related cues, or a control  
210 condition (control:  $n = 24$ ). Each task version comprised 768 trials. Each trial began  
211 with a fixation cross (500 ms), before a picture pair (smoking image, neutral image)  
212 was presented on a computer screen. The picture pair stayed on screen for 500 ms  
213 and then was replaced by a probe (small square or circle) in a location previously  
214 occupied by one of the pictures. Participants were required to identify whether the  
215 probe was a square or circle by pressing designated keyboard keys.

216           The majority of trials ( $n = 512$ ) were training trials, presented in four blocks,  
217 and the remainder of trials ( $n = 256$ ) were test trials. Half of the test trials ( $n = 128$ )  
218 were presented prior to the training trials (baseline test), and half ( $n = 128$ ) after the  
219 training trials, in order to assess the effect of the CBM on cognitive bias. In the test  
220 trials, the probe appeared with equal frequency in the location of the smoking-related  
221 or neutral picture. In the training trials, the probe appeared in the location of the  
222 neutral picture on 75% of trials in the avoid condition, or the smoking-related picture  
223 on 75% of trials in the attend condition, or with equal frequency in the location of  
224 neutral and smoking-related pictures in the control condition. The inter-trial interval  
225 jittered between 750 ms and 1,250 ms. The tasks were programmed and presented  
226 using EPrime version 2 software (Psychology Software Tools Inc., Pittsburgh PA),  
227 and total task time was approximately 50 minutes.

228           *Cognitive Bias Generalisation Test (modified Stroop)*: A pictorial version of the  
229 modified Stroop task was used to investigate the effect of dot-probe CBM on a different  
230 measure of cognitive bias. The task began with 16 practice trials followed by two  
231 experimental blocks, each comprising 8 buffer and 96 experimental trials (i.e., 208  
232 trials in total). For each trial a picture was presented (smoking-related or neutral)  
233 centrally on screen. The picture was surrounded by a coloured border and the

234 participant was required to identify the colour of the border (red, blue, yellow or green)  
235 using colour-marked keys on the keyboard.

236 *Questionnaires:* Questionnaire measures included the Eysenck Personality  
237 Questionnaire – Revised (EPQ-R) (Eysenck & Eysenck, 1991), the Questionnaire of  
238 Smoking Urges - Brief (QSU-Brief) (Tiffany & Drobes, 1991), the Minnesota Nicotine  
239 Withdrawal Scale (MNWS) (Hughes & Hatsukami, 1986) and visual analogue scales  
240 (VAS) of mood and cigarette craving.

241 *fMRI Acquisition:* An anatomical and a fMRI scan were performed on the test  
242 day (Day 7) with a Siemens Magnetom Skyra 3T scanner. BOLD images were  
243 acquired using an EPI sequence (36 slices, TR = 2,500 ms, TE = 30 ms, FOV = 19.2  
244 cm, matrix = 64 × 64, flip angle = 90°, slice thickness = 3 mm, resulting in 3 mm<sup>3</sup>  
245 isotropic voxels). A T1-weighted structural image was acquired using an MP-RAGE  
246 sequence with a 0.9 mm<sup>3</sup> isotropic voxel size and 192 slices. During the fMRI cue  
247 exposure procedure, smoking-related and control cues were presented in a boxcar  
248 design with four blocks per category. Participants were required to make a button  
249 press on each stimulus presentation to confirm they had seen the image (this did not  
250 terminate viewing time). Each block lasted 40 s, during which time 8 cues were  
251 presented. Before and after each block, a crosshair was presented for 5 s.  
252 Participants were then asked to rate cigarette craving on an 8-point scale (“none at  
253 all” to “extreme”). The scale was presented for 10 s followed by a crosshair for  
254 another 10 s. Thus, the total interblock-interval was 25 s. The sequence of events  
255 was controlled using EPrime version 2 software (Psychology Software Tools Inc.,  
256 Pittsburgh PA), and total task time was approximately 10 min.

257

## 258 **Procedure**

259 Individuals who responded to study advertisements were sent the full  
260 information sheet and completed a telephone screening to assess basic eligibility.  
261 Eligible participants were then booked in for a screening and baseline assessment

262 session (Day 0). At this session full written informed consent was taken by a trained  
263 researcher, and then the screening procedure was completed. This included  
264 measures of expired breath alcohol and carbon monoxide, height, weight, blood  
265 pressure and heart rate. A urine screen was performed to test for recent drug use  
266 (all) and pregnancy (females). A medical doctor then completed a general physical  
267 and psychiatric health assessment, and prescribed the study medication if  
268 appropriate. Then participants completed a baseline assessment of cognitive bias  
269 (modified Stroop), questionnaires assessing personality (EPQ-R), cigarette craving  
270 and withdrawal (QSU, MNWS) and mood (VASs), and a practice version of the task  
271 that they would completed during the fMRI scan at the second visit (Day 7).

272 Participants were then sent away with the study medication, medication  
273 packaging information and a drug diary (which they were required to complete and  
274 return at the next visit). The second session (test day) was then scheduled for  
275 approximately one week later. This session fell on day 7 of their drug regimen.

276 On the test day (Day 7), participants returned with their drug diaries and any  
277 untaken medication. Prior to the scan, they completed the Stroop task followed by a  
278 short visual dot probe task that measured baseline cognitive bias. Participants then  
279 completed one version of CBM (avoid, attend, control) per the study randomisation.  
280 The test version of the dot-probe task was run again immediately post-CBM in order  
281 to assess changes in cognitive bias. Following this, participants completed a 4-  
282 minute anatomical scan and then the cue-exposure test during a 15 minute fMRI  
283 scan. After scanning, participants completed the modified Stroop task and  
284 questionnaires (QSU, visual analogue scales) again. At the end of the test session,  
285 participants were offered smoking cessation literature, debriefed, and reimbursed.

286

## 287 **Data analysis**

288 The protocol for this study was published in *Trials* in October 2014 (Attwood,  
289 Williams, Adams, McClernon, & Munafo, 2014).

290 *Cognitive bias analyses (visual dot probe test of CBM and Stroop):* All data  
291 were examined for outliers (defined as scores three or more standard deviations  
292 above or below the group mean). Removals are noted in text. Data were assessed  
293 for normality and transformed using log 10 transformations (or square root where  
294 data include zero scores) where deviations from normality were observed.

295 Mean reaction time data were extracted for each of the four variables from  
296 the visual dot probe tests that were completed before and after CBM training (pre-  
297 training neutral, pre-training smoking, post-training neutral, post-training smoking).  
298 Cognitive bias scores were calculated by subtracting RTs to probes that replaced  
299 smoking-related pictures from RTs to probes that replaced neutral pictures, so that  
300 positive scores represent a bias towards smoking cues and negative scores  
301 represent a bias towards neutral cues. These bias scores were used to examine  
302 cognitive training effects in a 2 (pre-, post-CBM) × 2 (varenicline, placebo) × 3  
303 (attend, avoid, control) mixed model ANOVA.

304 A similar procedure was applied to Stroop data (test of cognitive bias  
305 generalisation). Mean reaction times and errors were extracted for smoking and  
306 neutral images during tasks completed before and after CBM training. Bias scores  
307 were calculated for each variable and used in the same 3-way mixed model ANOVA  
308 (detailed above), with exception that the subtraction was reversed (i.e., neutral  
309 scores were subtracted from smoking scores). This was done for ease of  
310 interpretation as (unlike the visual dot probe) slower scores represent cognitive bias  
311 on the Stroop task. Therefore, for Stroop data presented here positive scores  
312 represent a cognitive bias to smoking cues.

313 *Questionnaire analyses:* Withdrawal (MNWS), craving (QSU) and mood (VAS)  
314 data were analysed in two time phase analyses using ANOVA. We first assessed tonic  
315 craving (QSU) defined as craving during drug treatment. This analysis used baseline  
316 data from sessions one and two in a 2 (pre-drug, post-drug treatment) × 2 (varenicline,  
317 placebo) mixed model ANOVA. We then examined craving and mood change across

Running head: Varenicline, cognitive bias modification and fMRI in smokers

318 CBM (i.e., on test day) in a series of 2 (pre-, post-CBM) × 2 (varenicline, placebo) × 3  
319 (attend, avoid, control) mixed ANOVAs.

320 *fMRI analysis:* BOLD signal pre-processing was conducted in FSL version  
321 5.0.1 (Jenkison et al, 2012) to remove noise and artefacts. The first two volumes of  
322 each run were discarded to allow for T1 stabilization. All functional images were  
323 corrected for head motion using rigid-body transformations (MCFLIRT; Jenkinson et  
324 al, 2002) and acquisition timing. Additional pre-processing steps included spatial  
325 smoothing using an 8 mm FWHM Gaussian filter, high-pass filtering, and registration  
326 to standard space using FLIRT.

327 Each participant's fMRI data was then entered into a first-level voxel-by-voxel  
328 analysis using the general linear model. Each cue block (smoke, control) was  
329 modelled as a boxcar function convolved with a double-γ hemodynamic response  
330 function that begins at the onset of the first cue in the block and ends at the end of  
331 the block (duration = 40 s). A smoking>control cue contrast image was created and  
332 input into a random effects analysis. A 2 (varenicline, placebo) × 3 (attend, avoid,  
333 control) mixed-model whole-brain ANOVA was used to examine smoking cue  
334 reactivity (smoking greater than control) between each group. Activation was  
335 evaluated within an *a priori* mask of anatomical brain regions identified in a meta-  
336 analysis of cue reactivity (Tang, Fellows, Small, & Dagher, 2012): nucleus  
337 accumbens, caudate, putamen, temporal gyrus, anterior cingulate gyrus, amygdala,  
338 insula, posterior cingulate cortex, inferior frontal gyrus, and angular gyrus. Resulting  
339 activations within the mask were considered significant at  $p < 0.001$  (uncorrected)  
340 with a minimum cluster extent threshold of 20 contiguous voxels. Smoking cue  
341 greater than control cue contrast images for each participant were input into random  
342 effects regression analyses examining relations between post-training cognitive bias  
343 scores and brain cue reactivity.

344 *Sample size determination:* The effects of cognitive bias on brain responses to  
345 smoking cues have not been evaluated in previous research. Data from our previous

346 studies (Attwood et al., 2008) indicated a likely increase in cognitive bias index of 30  
347 ms in the attend group, and a decrease of 30 ms in the avoid group. We assumed that  
348 the change in the control condition would be intermediate (i.e., 0 ms). Using these  
349 estimates, we calculated that we would achieve greater than 80% power to detect a  
350 linear effect across the three study groups on change in cognitive bias index with a  
351 total sample size of  $n = 30$ , at an alpha level of 0.05. Due to an additional factor of drug  
352 group (varenicline vs. placebo), the actual sample size we recruited was  $n = 72$ , with  $n$   
353 = 12 per experimental group.

354

355

## Results

### 356 Characteristics of participants

357 Four participants withdrew from the study (two from varenicline/control CBM  
358 condition, and two from placebo/avoid CBM condition) and therefore the final sample  
359 comprised 68 participants (53% female). Participants were aged between 18 and 39  
360 years ( $M = 23$ ,  $SD = 5$ ) and smoked between 10 and 25 cigarettes per day ( $M = 15$ ,  $SD$   
361 = 3). Alcohol Use Disorders Identifier Test scores ranged between 5 and 24 ( $M = 13$ ,  
362  $SD = 4$ ). EPQ-R scores ranged between 3 and 17 ( $M = 8$ ,  $SD = 3$ ) for psychoticism, 0  
363 and 20 ( $M = 7$ ,  $SD = 4$ ) for neuroticism, and 10 and 23 ( $M = 18$ ,  $SD = 3$ ) for  
364 extraversion. See Table 1. for participant characteristics by drug and CBM condition.

365

366

Running head: Varenicline, cognitive bias modification and fMRI in smokers

367 Table 1. Mean (SD) participant characteristics, baseline craving and nicotine  
 368 withdrawal  
 369

|                  | Attend<br>(N = 24) |                     | Avoid<br>(N = 22)  |                     | Control<br>(N = 22) |                     |
|------------------|--------------------|---------------------|--------------------|---------------------|---------------------|---------------------|
|                  | Varen.<br>(N = 12) | Placebo<br>(N = 12) | Varen.<br>(N = 12) | Placebo<br>(N = 10) | Varen.<br>(N = 10)  | Placebo<br>(N = 12) |
| Age              | 25.5<br>(4.9)      | 22.3<br>(4.5)       | 26.0<br>(7.6)      | 21.7<br>(3.0)       | 21.9<br>(3.3)       | 21.3<br>(2.9)       |
| CPD              | 15.5<br>(2.8)      | 14.5<br>(3.7)       | 15.5<br>(3.6)      | 14.2<br>(2.9)       | 14.6<br>(3.3)       | 16.1<br>(3.6)       |
| AUDIT            | 8.1<br>(5.1)       | 9.3<br>(3.9)        | 9.5<br>(3.3)       | 9.0<br>(2.9)        | 9.5<br>(3.2)        | 8.0<br>(3.0)        |
| Baseline<br>QSU  | 35.4<br>(8.7)      | 35.7<br>(11.0)      | 33.8<br>(12.3)     | 38.2<br>(10.6)      | 31.5<br>(9.8)       | 36.4<br>(9.8)       |
| Baseline<br>MNWS | 7.2<br>(5.5)       | 8.5<br>(6.9)        | 6.6<br>(3.9)       | 9.9<br>(9.6)        | 5.8<br>(4.9)        | 10.5<br>(6.8)       |
| EPQ-R<br>Neu.    | 7.1<br>(4.7)       | 7.0<br>(3.5)        | 7.4<br>(4.8)       | 7.0<br>(5.5)        | 5.0<br>(2.9)        | 6.4<br>(4.6)        |
| EPQ-R<br>Psy.    | 8.3<br>(4.2)       | 6.7<br>(2.8)        | 7.4<br>(3.6)       | 6.1<br>(1.9)        | 7.4<br>(3.1)        | 9.0<br>(4.1)        |
| EPQ-R<br>Ext.    | 17.9<br>(3.4)      | 18.8<br>(3.1)       | 17.9<br>(2.7)      | 17.5<br>(3.3)       | 17.7<br>(2.4)       | 17.8<br>(2.7)       |

370  
 371 Values represent mean (SD). SD = standard deviation; Varen. = varenicline, CPD = cigarettes  
 372 per day; AUDIT = Alcohol Use Disorder Identifier Test; QSU = Questionnaire of smoking urges;  
 373 MNWS = Minnesota Nicotine Withdrawal Scale; EPQ-R = Eysenck Personality Questionnaire-  
 374 Revised, Neu = neuroticism; Psy = psychoticism; Ext = extraversion.  
 375

376 **Cognitive bias modification test (visual dot probe)**

377 Due to computer malfunction, post-training CBM data were not recorded for  
 378 one participant, therefore post-training sample comprises 67 participants. This  
 379 participant completed the allocated CBM training and therefore their data have been  
 380 retained in all other analysis. Prior to the calculation of bias scores, reaction time data  
 381 of the four primary variables (pre-training neutral, pre-training smoking, post-training  
 382 neutral, post-training smoking) were assessed for normality, and there was evidence of  
 383 positive skewness on three of the four variables. Therefore log 10 transformation was

384 applied to the data prior to the bias calculations being performed. The 2 (pre-, post-  
385 CBM) × 2 (varenicline, placebo) × 3 (attend, avoid, control) mixed model ANOVA  
386 showed no main effects or interactions ( $p_s > .23$ ). These findings did not change if  
387 untransformed data were used ( $p_s > .18$ ).

388

### 389 **Cognitive bias generalisation test (modified Stroop)**

390 For error data, three participants were identified as outliers in the pre-CBM  
391 condition and one participant was identified as an outlier in the post-CBM condition.  
392 These data were removed from main analysis. After data removal error data were not  
393 normally distributed and a square root transformation was applied to these data.

394 There was weak evidence of a drug × CBM interaction ( $F[1, 57] = 2.74, p =$   
395  $.073, \eta_p^2 = .09$ ) for errors, reflecting a bias towards smoking (versus neutral) cues in  
396 the attend CBM condition (compared to avoid and neutral conditions) but only in  
397 individuals who had received placebo. In contrast, participants who received  
398 varenicline showed a bias towards neutral in the attend condition (compared to avoid  
399 and neutral conditions). The evidence for this effect was weaker when untransformed  
400 data were used ( $p = .18$ ) and when outliers were included ( $p = .29$ ). There was no  
401 evidence of any other main effects or interactions for Stroop error ( $p_s > .13$ ) or reaction  
402 time ( $p_s > .15$ ) data.

403

### 404 **Questionnaire data**

405 *Withdrawal across drug treatment:* There was weak evidence of an effect of  
406 drug ( $F[1,66] = 3.34, p = .072, \eta_p^2 = .05$ ) with lower nicotine withdrawal in the drug ( $M$   
407  $= 7.0, SD = 6.3$ ) compared to placebo group ( $M = 9.8, SD = 6.3$ ). There was no clear  
408 evidence of an effect of time or time by drug interaction ( $p_s > .35$ ).

409 *Tonic craving across drug treatment:* For QSU data, there was evidence of  
410 effects of time ( $F[1,65] = 33.61, p < .001, \eta_p^2 = .34$ ) and drug ( $F[1,65] = 6.06, p = .017,$   
411  $\eta_p^2 = .09$ ), which were subsumed under a time × drug interaction ( $F[1,65] = 4.37, p =$



Running head: Varenicline, cognitive bias modification and fMRI in smokers

412 0.04,  $\eta_p^2 = .06$ ). Post-hoc paired samples t-tests showed that there was a decrease in  
413 craving from session one (pre-drug) to session two (post-drug) in both drug groups, but  
414 this effect was larger in the varenicline group (see Table 2). For cigarette craving VAS  
415 data, the main effects of time ( $F[1,61] = 56.62, p < .001, \eta_p^2 = .48$ ) and drug ( $F[1,61] =$   
416  $16.32, p < .001, \eta_p^2 = .21$ ) were replicated but there were no other effects or  
417 interactions ( $ps > .34$ ).

418 *Mood (VAS) across drug treatment:* There was evidence of effects of time for  
419 happiness ( $F[1,62] = 4.37, p = .041, \eta_p^2 = .07$ ), drowsiness ( $F[1,62] = 3.78, p = .057,$   
420  $\eta_p^2 = .06$ ), depression ( $F[1,62] = 9.93, p = .003, \eta_p^2 = .14$ ), anxiety ( $F[1,62] = 3.22, p =$   
421  $.078, \eta_p^2 = .05$ ) and irritability ( $F[1,62] = 8.56, p = .005, \eta_p^2 = .12$ ), with decreases in  
422 happiness, and increases in drowsiness, depression, anxiety and irritability. There was  
423 also evidence of an effect of drug for anxiety ( $F[1,62] = 9.01, p = .004, \eta_p^2 = .13$ ), with  
424 lower anxiety reported in the varenicline group. There was no clear evidence of any  
425 other main effects or interactions ( $ps > .10$ ).

426

427 Table 2: Craving (QSU) scores from pre- to post drug administration in varenicline and  
428 placebo groups

429

|             | Mean difference<br>from session one<br>to session two<br>(SD) | Effect size<br>(dz) | 95% CI        | p-value |
|-------------|---------------------------------------------------------------|---------------------|---------------|---------|
| Placebo     | -4.7 (10.3)                                                   | 0.46                | -8.4 to -1.1  | 0.013   |
| Varenicline | -10.1 (10.6)                                                  | 0.95                | -13.8 to -6.4 | <0.001  |

430

431 *Withdrawal across CBM (pre-CBM to post-scan):* There was evidence of a main effect  
432 of time ( $F[1,62] = 14.98, p < .001, \eta_p^2 = .20$ ) with increases in withdrawal pre-CBM ( $M$   
433  $= 8.6, SD = 7.3$ ) to post-CBM ( $M = 11.3, SD = 7.7$ ). There was no clear evidence for  
434 other main effects or interactions ( $ps > .14$ ).

435

436 *Craving (QSU) across CBM (pre-CBM to post-scan)*: For QSU data, there was  
437 evidence of effects of time ( $F[1,62] = 62.6, p < .001, \eta_p^2 = .50$ ) and drug ( $F[1,62] =$   
438  $8.82, p = .004, \eta_p^2 = .13$ ), indicating increases in craving from pre-CBM ( $M = 27.7, SD =$   
439  $12.1$ ) to post scan ( $M = 38.5, SD = 12.8$ ) and higher craving in the placebo group ( $M =$   
440  $36.9, SD = 9.7$ ) compared to varenicline group ( $M = 29.3, SD = 11.6$ ). There was no  
441 strong evidence of other main effects or interactions ( $ps > .08$ ). The main effects of  
442 time ( $F[1,62] = 56.62, p < .001, \eta_p^2 = .48$ ) and drug ( $F[1,62] = 16.32, p < .001, \eta_p^2 =$   
443  $.21$ ) were replicated using craving VAS data, and there was no clear evidence of any  
444 other effects or interactions ( $ps > .34$ ).

445 *Mood across CBM session (pre-CBM to post-scan)*: There was evidence of  
446 main effects of time for happiness ( $F(1,61) = 4.24, p = .044, \eta_p^2 = .07$ ), drowsiness  
447 ( $F(1,61) = 12.86, p = .001, \eta_p^2 = .17$ ), energy ( $F(1,61) = 8.24, p = .006, \eta_p^2 = .12$ ) and  
448 irritability ( $F(1,61) = 7.71, p = .007, \eta_p^2 = .11$ ), with decreases in happiness and energy,  
449 and increases in drowsiness and irritability across the session. There was evidence of  
450 a main effect of drug ( $F(1,61) = 6.46, p = .014, \eta_p^2 = .10$ ) and a time  $\times$  drug interaction  
451 ( $F(1,61) = 6.15, p = .016, \eta_p^2 = .09$ ) for anxiety, with higher anxiety in the placebo group  
452 ( $M = 25.4, SD = 19.9$ ) compared to varenicline group ( $M = 15.1, SD = 14.0$ ). Post-hoc  
453 paired t-tests indicated a decrease in anxiety across the session in the placebo group  
454 ( $t = 2.35, df = 33, p = .025, dz = .40$ ), but not the varenicline group ( $t = -1.25, df = 32, p$   
455  $= .22, dz = .22$ ). Finally there was evidence of a drug  $\times$  CBM interaction for happiness  
456 ( $F(2,61) = 4.36, p = .017, \eta_p^2 = .13$ ), with the varenicline group reporting lower  
457 happiness than the placebo group but only in the attend CBM condition.

458

#### 459 **Neural response (fMRI data)**

460 Following pre-processing, three participants (2 in the varenicline-attend group,  
461 1 in the control-placebo group) were excluded from fMRI imaging analysis (2 due to  
462 excessive motion and 1 due to poor signal quality). There was no evidence of main  
463 effects of drug or CBM within the *a priori* mask. There was strong evidence of a drug  $\times$

Running head: Varenicline, cognitive bias modification and fMRI in smokers

464 CBM interaction in one cluster ( $k = 32$ ) in the right middle temporal gyrus (peak voxel:  $x$   
465  $= 58$ ,  $y = -58$ ,  $z = 12$ ;  $z = 3.78$ ,  $p < 0.001$ ). The placebo group exhibited greater  
466 temporal gyrus activation to smoking cues than the varenicline group in the control  
467 CBM condition ( $t = 2.86$ ,  $p = .006$ ) but less activation than the varenicline group in the  
468 toward CBM condition ( $t = 2.41$ ,  $p = .02$ ) (Figure 1).

469

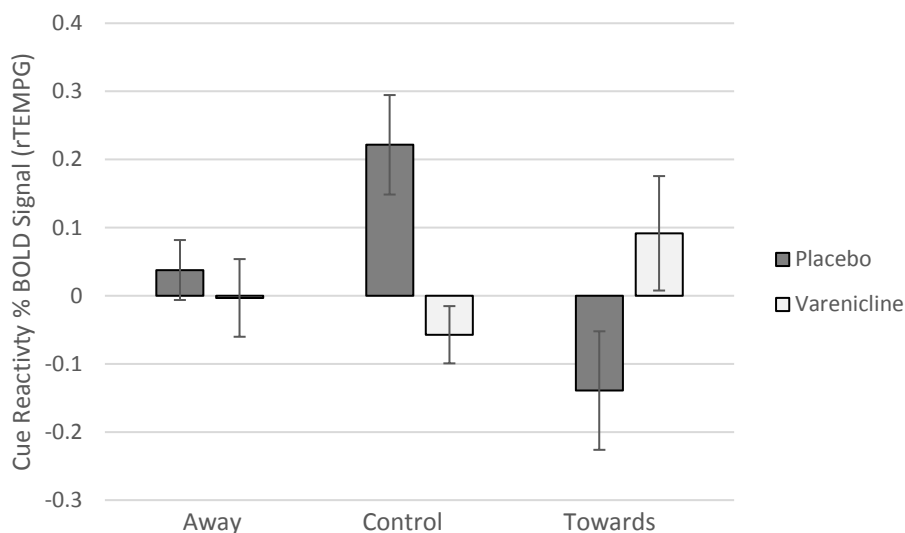

470

471

472 Figure 1: Neural response to smoking cues (% BOLD signal) in the right  
473 temporal gyrus across the three CBM groups following 1-week administration of  
474 placebo or varenicline.

475

476 Cognitive bias data from the visual dot probe task used in the regression  
477 analysis were transformed as described above. One subject with useable imaging data  
478 was excluded from the analysis due to incomplete behavioural data. Correlation  
479 between post-training bias scores and smoking cue reactivity (i.e., smoking greater  
480 than control cue contrasts) were put into a regression analysis. There was no clear  
481 evidence for areas of activation ( $ps > 0.001$ ).

482

483 **Discussion**

484 We investigated the effects of CBM and one-week varenicline treatment on  
485 neural response to smoking-related cues in current smokers. There was no evidence  
486 that CBM training alone altered cognitive bias (post-CBM visual dot probe, Stroop),  
487 mood, craving or neural response to smoking-cues. There was evidence of reduced  
488 craving in the varenicline group as evinced by several drug by time interactions. Across  
489 the drug administration phase of the study (i.e., the six days preceding the study  
490 session), there was a greater reduction in QSU scores for the varenicline compared to  
491 placebo group. A main effect of drug was also evident for VAS craving scores (i.e.,  
492 lower craving in varenicline group); however, the drug by time interaction was not  
493 replicated. The lower reports of craving in the varenicline group were also evident at  
494 the study session, during which CBM was administered. Finally, there was weak  
495 evidence that varenicline may have attenuated CBM-induced smoking bias, as there  
496 was an increase in smoking bias following CBM attend training, but only in the placebo  
497 group. There was no evidence of an interaction between varenicline and CBM on  
498 withdrawal, craving or mood.

499 There was evidence of a drug by CBM interaction on neural responses in one  
500 region within our *a priori* cue-reactivity mask. In right middle temporal gyrus (rMTG),  
501 activation in response to smoking relative to neutral cues was greater in the placebo as  
502 compared to the varenicline condition in the control CBM condition; the opposite  
503 pattern was observed in the toward CBM condition. Whereas the rMTG has been  
504 shown to be active in response to viewing smoking cues in meta-analyses (Tang et al.,  
505 2012), little has been reported regarding its potential role in processing conditioned  
506 smoking cues. Activation in the specific rMTG location we observed, has also been  
507 observed in studies of Theory of Mind, or the social-cognitive ability to infer the  
508 emotional and motivational experience (Vollm et al., 2006), where it may be involved in  
509 retrieval of memories associated with the behaviour of others. In the context of the  
510 present study, varenicline in the control CBM condition may decrease the degree to

Running head: Varenicline, cognitive bias modification and fMRI in smokers

511 which such memories are accessed due to decreased tonic craving. Why toward CBM  
512 training would reverse such effects is unclear from the data, which suggests that  
513 additional research is needed to fully understand the influence of CBM on the  
514 processing of smoking cues.

515       Taken together these findings support a benefit of varenicline on tonic craving  
516 and neural response to smoking cues (which may be driven by the craving effects).  
517 While the effects of varenicline may be small, they are meaningful given the fact that  
518 the dosing regime delivered in the study is substantially lower than the clinically  
519 prescribed dose (i.e., 1 week compared to a standard 12-week course). However, we  
520 found no evidence of a benefit of CBM on any outcomes, and little evidence that  
521 varenicline would be a useful adjunct to smoking-related CBM. The CBM by drug  
522 interaction that was observed for the fMRI data, indicated that the effects of varenicline  
523 may have been attenuated for active CBM (i.e., the effects were only observed in the  
524 control training group). However, numbers are small and therefore this effect requires  
525 replication.

526       It is noteworthy that we did not find effects of CBM on measures of cognitive  
527 bias (visual dot probe and Stroop). There are known issues with the reliability of  
528 cognitive bias tests (Ataya et al., 2012), and therefore this may be a failure of the  
529 measure rather than a lack of effect. However, this indicates that the CBM may not  
530 have been effective, and these findings should be interpreted with this in mind. We  
531 hypothesised that effects of CBM would be potentiated by varenicline and our failure to  
532 observe such effects may be due to there being no CBM effects to strengthen. It is  
533 plausible that varenicline may potential effects of CBM if these effects can be reliably  
534 achieved.

535       There are some limitations of this study that should be considered when  
536 interpreting these findings. First, our sample size was small for the analysis of  
537 interactions. Our planned recruitment of 72 participants was achieved but not all  
538 participants were tested to completion, and our final sample was lower (n = 67 for

Running head: Varenicline, cognitive bias modification and fMRI in smokers

539 subjective and cognitive data; n = 64 for fMRI data). We also have a computer  
540 malfunction for one of the conditions that was not identified until data were extracted.  
541 We had to replace a number of participants in one CBM condition (avoid) and therefore  
542 these individuals were tested outside of the randomisation sequence. We do not  
543 however expect that this had a substantial effect on outcomes as these individuals  
544 were testing in close time proximity to the rest of the sample. Furthermore, the  
545 researchers collecting data were not aware of the reason for additional recruitment,  
546 and therefore double-blinding was maintained. Third, our study recruited non-treatment  
547 seeking smokers, and it is plausible that effects of CBM may be stronger in individuals  
548 seeking treatment.

549         This study investigated neural responses to smoking cues following varenicline  
550 and CBM treatment. There was little evidence of neural effects of either drug or CBM.  
551 However, there was evidence of reductions in craving among smokers who completed  
552 one-week of varenicline treatment. Drug by CBM interactions were exploratory due to  
553 small sample sizes, but we observed an interaction on right temporal gyrus activity.  
554 Specifically, varenicline appeared to attenuate cue-related activity in the right temporal  
555 gyrus that was presented in the placebo group. However, this effect should be  
556 replicated in future research. In summary, this study finds little evidence of clinical  
557 potential of CBM.

558

559

560 **Abbreviations**

561 CBM: Cognitive bias modification; EPQ-R: Eysenck Personality Questionnaire-  
562 Revised; MNWS: Minnesota Nicotine Withdrawal Scale; RT: reaction time; VAS: visual  
563 analogue scales.

564

565 **Competing interests**

566 MRM and ASA have received grant funding from Pfizer Ltd. FJM received partial salary  
567 support (2.5%) from an unrestricted grant funded by Philip Morris from April 2009 to  
568 October 2010.

569

570 **Author contributions**

571 MRM, FJM, SA and ASA contributed to the conception and design of the trial, and  
572 plans for data analysis. SA and ASA participated in data collection and project  
573 management. FJM and RK analysed and interpreted fMRI data. TW leads the clinical  
574 team (including DC, AG and KS) for subject recruitment. ASA drafted the manuscript,  
575 and all authors discussed, read and revised the manuscript. All authors approved the  
576 publication of this protocol.

577

578 **Acknowledgements**

579 This study was supported by a Pfizer Ltd. Investigator Initiated Grant (grant ID:  
580 WS676950). MRM, ASA and SA are members of the UK Centre for Tobacco and  
581 Alcohol Studies, a UKCRC Public Health Research Centre of Excellence. ASA and  
582 MRM are members of the MRC Integrative Epidemiology Unit at the University of  
583 Bristol. We thank Aileen Wilson, Emma Howell, Alexander Davidson, George Stothart  
584 and Olivia Maynard for their assistance with data collection.

585

586 **References**

- 587 Abrams, D. B., Monti, P. M., Carey, K. B., Pinto, R. P., & Jacobus, S. I. (1988).  
588 Reactivity to smoking cues and relapse: two studies of discriminant validity.  
589 *Behav Res Ther*, 26(3), 225-233. doi:0005-7967(88)90003-4 [pii]  
590 Ataya, A. F., Adams, S., Mullings, E., Cooper, R. M., Attwood, A. S., & Munafo, M. R.  
591 (2012). Internal reliability of measures of substance-related cognitive bias. *Drug*  
592 *Alcohol Depend*, 121(1-2), 148-151. doi:10.1016/j.drugalcdep.2011.08.023  
593 Attwood, A. S., O'Sullivan, H., Leonards, U., Mackintosh, B., & Munafo, M. R. (2008).  
594 Attentional bias training and cue reactivity in cigarette smokers. *Addiction*,  
595 103(11), 1875-1882. doi:10.1111/j.1360-0443.2008.02335.x  
596 Attwood, A. S., Williams, T., Adams, S., McClernon, F. J., & Munafo, M. R. (2014).  
597 Effects of varenicline and cognitive bias modification on neural response to  
598 smoking-related cues: study protocol for a randomized controlled study. *Trials*,  
599 15, 391. doi:10.1186/1745-6215-15-391  
600 Baert, S., De Raedt, R., Schacht, R., & Koster, E. H. (2010). Attentional bias training in  
601 depression: therapeutic effects depend on depression severity. *J Behav Ther*  
602 *Exp Psychiatry*, 41(3), 265-274. doi:10.1016/j.jbtep.2010.02.004  
603 Brandon, T. H., Drobos, D. J., Unrod, M., Heckman, B. W., Oliver, J. A., Roetzheim, R.  
604 C., . . . Small, B. J. (2011). Varenicline effects on craving, cue reactivity, and  
605 smoking reward. *Psychopharm. (Berl)*, 218(2), 391-403. doi:10.1007/s00213-  
606 011-2327-z  
607 Cox, W. M., Pothos, E. M., & Hosier, S. G. (2007). Cognitive-motivational predictors of  
608 excessive drinkers' success in changing. *Psychopharm. (Berl)*, 192(4), 499-  
609 510. doi:10.1007/s00213-007-0736-9  
610 Eysenck, H. J., & Eysenck, S. B. G. (1991). *The Eysenck Personality Questionnaire -*  
611 *Revised*. London: Hodder and Stoughton.  
612 Field, M., & Christiansen, P. (2012). Commentary on, 'Internal reliability of measures of  
613 substance-related cognitive bias'. *Drug Alcohol Depend*, 124(3), 189-190.  
614 doi:10.1016/j.drugalcdep.2012.02.009  
615 Field, M., Duka, T., Tyler, E., & Schoenmakers, T. (2009). Attentional bias modification  
616 in tobacco smokers. *Nicotine Tob Res*, 11(7), 812-822. doi:10.1093/ntr/ntp067  
617 Field, M., Munafo, M. R., & Franken, I. H. (2009). A meta-analytic investigation of the  
618 relationship between attentional bias and subjective craving in substance  
619 abuse. *Psychol Bull*, 135(4), 589-607. doi:2009-09537-005 [pii]  
620 10.1037/a0015843  
621 Foltin, R. W., & Haney, M. (2000). Conditioned effects of environmental stimuli paired  
622 with smoked cocaine in humans. *Psychopharm. (Berl)*, 149(1), 24-33.  
623 Franken, I. H. (2003). Drug craving and addiction: integrating psychological and  
624 neuropsychopharmacological approaches. *Prog Neuropsychopharmacol Biol*  
625 *Psychiatry*, 27(4), 563-579. doi:S0278-5846(03)00081-2 [pii]  
626 10.1016/S0278-5846(03)00081-2  
627 Gray, K. M., LaRowe, S. D., & Upadhyaya, H. P. (2008). Cue reactivity in young  
628 marijuana smokers: a preliminary investigation. *Psychol Addict Behav*, 22(4),  
629 582-586. doi:2008-17215-015 [pii]  
630 10.1037/a0012985  
631 Hester, R., & Luijten, M. (2013). Neural correlates of attentional bias in addiction. *CNS*  
632 *Spectr.*, 1-8. doi:10.1017/S1092852913000473  
633 Hughes, J. R., & Hatsukami, D. (1986). Signs and symptoms of tobacco withdrawal.  
634 *Arch Gen Psychiatry*, 43(3), 289-294.  
635 Le Foll, B., Chakraborty-Chatterjee, M., Lev-Ran, S., Barnes, C., Pushparaj, A.,  
636 Gamaledin, I., . . . Goldberg, S. R. (2012). Varenicline decreases nicotine self-  
637 administration and cue-induced reinstatement of nicotine-seeking behaviour in  
638 rats when a long pretreatment time is used. *Int J Neuropsychopharmacol.*,  
639 15(9), 1265-1274. doi:10.1017/S1461145711001398



- 640 Lopes, F. M., Pires, A. V., & Bizarro, L. (2014). Attentional bias modification in smokers  
641 trying to quit: a longitudinal study about the effects of number of sessions. *J*  
642 *Subst Abuse Treat*, *47*(1), 50-57. doi:10.1016/j.jsat.2014.03.002
- 643 Marissen, M. A., Franken, I. H., Blanken, P., van den Brink, W., & Hendriks, V. M.  
644 (2007). Cue exposure therapy for the treatment of opiate addiction: results of a  
645 randomized controlled clinical trial. *Psychother Psychosom*, *76*(2), 97-105.  
646 doi:000097968 [pii]  
647 10.1159/000097968
- 648 McClernon, F. J., Conklin, C. A., Kozink, R. V., Adcock, R. A., Sweitzer, M. M.,  
649 Addicott, M. A., . . . DeVito, A. M. (2016). Hippocampal and Insular Response  
650 to Smoking-Related Environments: Neuroimaging Evidence for Drug-Context  
651 Effects in Nicotine Dependence. *Neuropsychopharmacology*, *41*(3), 877-885.  
652 doi:10.1038/npp.2015.214
- 653 McClernon, F. J., Kozink, R. V., Lutz, A. M., & Rose, J. E. (2009). 24-h smoking  
654 abstinence potentiates fMRI-BOLD activation to smoking cues in cerebral  
655 cortex and dorsal striatum. *Psychopharmacology (Berl)*, *204*(1), 25-35.  
656 doi:10.1007/s00213-008-1436-9
- 657 McClernon, F. J., Kozink, R. V., & Rose, J. E. (2008). Individual differences in nicotine  
658 dependence, withdrawal symptoms, and sex predict transient fMRI-BOLD  
659 responses to smoking cues. *Neuropsychopharmacology*, *33*(9), 2148-2157.  
660 doi:10.1038/sj.npp.1301618
- 661 McHugh, R. K., Murray, H. W., Hearon, B. A., Calkins, A. W., & Otto, M. W. (2010).  
662 Attentional bias and craving in smokers: the impact of a single attentional  
663 training session. *Nicotine Tob Res*, *12*(12), 1261-1264. doi:10.1093/ntr/ntq171
- 664 Mucha, R. F., Pauli, P., & Angrilli, A. (1998). Conditioned responses elicited by  
665 experimentally produced cues for smoking. *Can J Physiol Pharmacol*, *76*(3),  
666 259-268.
- 667 Muntaner, C., Cascella, N. G., Kumor, K. M., Nagoshi, C., Herning, R., & Jaffe, J.  
668 (1989). Placebo responses to cocaine administration in humans: effects of prior  
669 administrations and verbal instructions. *Psychopharm. (Berl)*, *99*(2), 282-286.
- 670 Niaura, R., Abrams, D., Demuth, B., Pinto, R., & Monti, P. (1989). Responses to  
671 smoking-related stimuli and early relapse to smoking. *Addict Behav*, *14*(4), 419-  
672 428.
- 673 Ray, L. A., Lunny, K., Bujarski, S., Moallem, N., Krull, J. L., & Miotto, K. (2013). The  
674 effects of varenicline on stress-induced and cue-induced craving for cigarettes.  
675 *Drug Alcohol Depend*, *131*(1-2), 136-142.  
676 doi:10.1016/j.drugalcdep.2012.12.015
- 677 Swerdlow, N. R. (2012). Beyond antipsychotics: pharmacologically-augmented  
678 cognitive therapies (PACTs) for schizophrenia. *Neuropsychopharm.*, *37*(1),  
679 310-311. doi:10.1038/npp.2011.195
- 680 Tang, D. W., Fellows, L. K., Small, D. M., & Dagher, A. (2012). Food and drug cues  
681 activate similar brain regions: a meta-analysis of functional MRI studies. *Physiol*  
682 *Behav*, *106*(3), 317-324. doi:10.1016/j.physbeh.2012.03.009
- 683 Tiffany, S. T., & Drobos, D. J. (1991). The development and initial validation of a  
684 questionnaire on smoking urges. *Br J Addict*, *86*(11), 1467-1476.
- 685 Unrod, M., Drobos, D. J., Stasiewicz, P. R., Ditre, J. W., Heckman, B., Miller, R. R., . . .  
686 Brandon, T. H. (2014). Decline in cue-provoked craving during cue exposure  
687 therapy for smoking cessation. *Nicotine Tob Res*, *16*(3), 306-315.  
688 doi:10.1093/ntr/ntt145
- 689 Vollm, B. A., Taylor, A. N., Richardson, P., Corcoran, R., Stirling, J., McKie, S., . . .  
690 Elliott, R. (2006). Neuronal correlates of theory of mind and empathy: a  
691 functional magnetic resonance imaging study in a nonverbal task. *Neuroimage*,  
692 *29*(1), 90-98. doi:10.1016/j.neuroimage.2005.07.022
- 693 Wakefield, M., Germain, D., & Henriksen, L. (2008). The effect of retail cigarette pack  
694 displays on impulse purchase. *Addiction*, *103*(2), 322-328. doi:ADD2062 [pii]

Running head: Varenicline, cognitive bias modification and fMRI in smokers

695 10.1111/j.1360-0443.2007.02062.x  
696 Waters, A. J., Shiffman, S., Sayette, M. A., Paty, J. A., Gwaltney, C. J., & Balabanis,  
697 M. H. (2004). Cue-provoked craving and nicotine replacement therapy in  
698 smoking cessation. *J Consult Clin Psychol*, 72(6), 1136-1143.  
699 doi:10.1037/0022-006X.72.6.1136  
700 World Health Organization. (2013). *WHO Global Report: Mortality Attributable to*  
701 *Tobacco*. Retrieved from  
702 Wouda, J. A., Riga, D., De Vries, W., Stegeman, M., van Mourik, Y., Schetters, D., . . .  
703 De Vries, T. J. (2011). Varenicline attenuates cue-induced relapse to alcohol,  
704 but not nicotine seeking, while reducing inhibitory response control.  
705 *Psychopharmacology (Berl)*, 216(2), 267-277. doi:10.1007/s00213-011-2213-8  
706
